# Supplementary material for: A localized surface plasmon resonance effect boosts photocatalytic hydrogen evolution of ZnIn2S4/amorphous MoO3−x nanodot Z-scheme heterojunctions
Source: Royal Society of Chemistry journal article supplement (doi:10.1039/d4ta08621j), 2025-01-01
Supplement: d4ta08621j1.pdf [file d4ta08621j1.pdf]

# Supporting Information

## Localized surface plasmon resonance effect boosts photocatalytic hydrogen evolution of ZnIn<sub>2</sub>S<sub>4</sub>/amorphous MoO<sub>3-x</sub> nanodot Z-scheme heterojunctions

Rui Liu<sup>a,1</sup>, Yunpei Cui<sup>a,1</sup>, Teng Wang<sup>a</sup>, Jiayou Liu<sup>b</sup>, Bo Liu<sup>a</sup>, Shuangshuang Zuo<sup>a</sup>,

Hesheng Yu<sup>a\*</sup>

a. Key Laboratory of Coal Processing and Efficient Utilization of Ministry of Education, School of Chemical Engineering and Technology, China University of Mining and Technology, Xuzhou, Jiangsu 221116, China

b. Eastern Institute for Advanced Study, Eastern Institute of Technology, Ningbo, Zhejiang 315200, China

1. These authors contribute equally.

\* Corresponding Author:

Dr. H. Yu, School of Chemical Engineering and Technology, China University of Mining and Technology, Xuzhou, Jiangsu, 221116, China. E-mail:

[heshengyu@cumt.edu.cn](mailto:heshengyu@cumt.edu.cn).

## Apparent quantum efficiency (AQE)

The experimental conditions were kept constant. The apparent quantum efficiencies (AQE) of ZIS and ZM10 composite photocatalyst were measured using different single-wavelength filters (350, 380, and 420 nm).<sup>1</sup> The value of AQE at a specific wavelength was calculated using the following equation.

$$AQE(\%) = \frac{N_e}{N_p} \times 100\% = \frac{2 \times nH_2 \times N_A \times h \times c}{I \times S \times t \times \lambda} \times 100\% \quad (1)$$

where  $N_e$  is the number of reacting electrons,  $N_p$  is the number of incident photons,  $nH_2$  is the amount of hydrogen evolution in 1 h in the units of mol,  $N_A$  is the Avogadro constant ( $6.023 \times 10^{23} \text{ mol}^{-1}$ ),  $h$  is the Planck constant ( $6.626 \times 10^{-34} \text{ J}\cdot\text{s}$ ),  $c$  is the speed of light ( $3 \times 10^8 \text{ m/s}$ ),  $I$  is the intensity of irradiation light ( $\text{W/cm}^2$ ),  $S$  is the corresponding light irradiation area ( $41.83 \text{ cm}^2$ ),  $t$  is the photoreaction time (3600 s), and  $\lambda$  is the wavelength of incident light (nm).

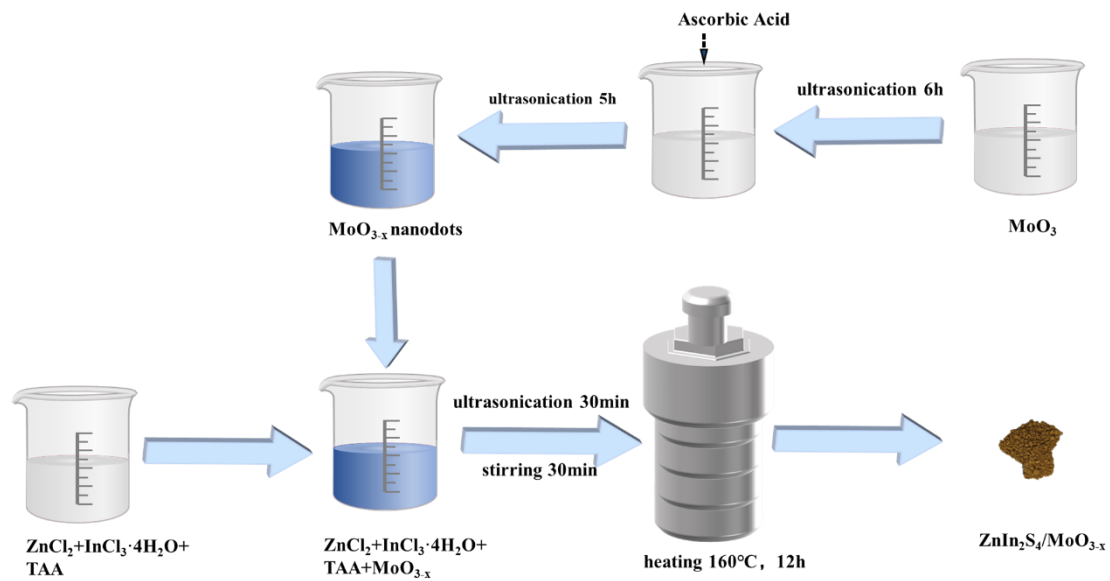

**Fig. S1** Schematic of the preparation of  $\text{ZnIn}_2\text{S}_4/\text{MoO}_{3-x}$  composite catalysts

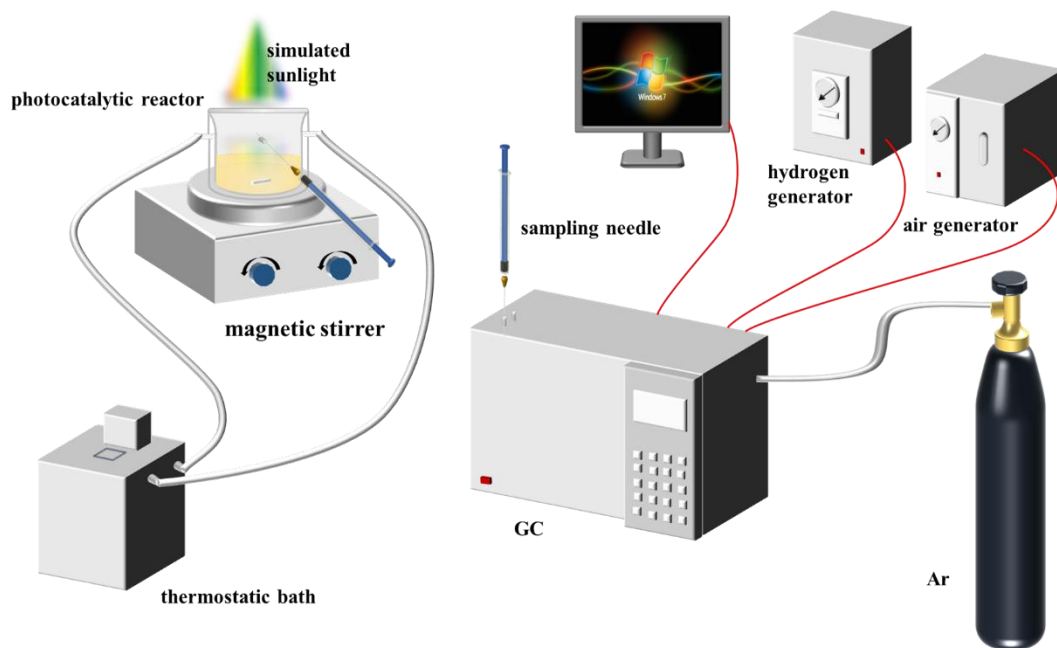

**Fig. S2** Photocatalytic system for hydrogen evolution.

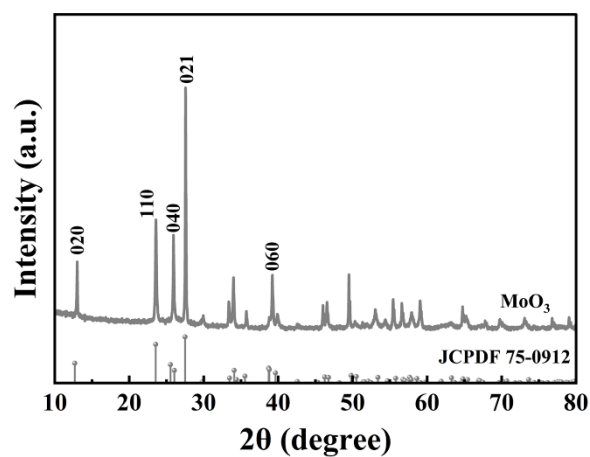

Fig. S3 XRD pattern of  $\text{MoO}_3$ .

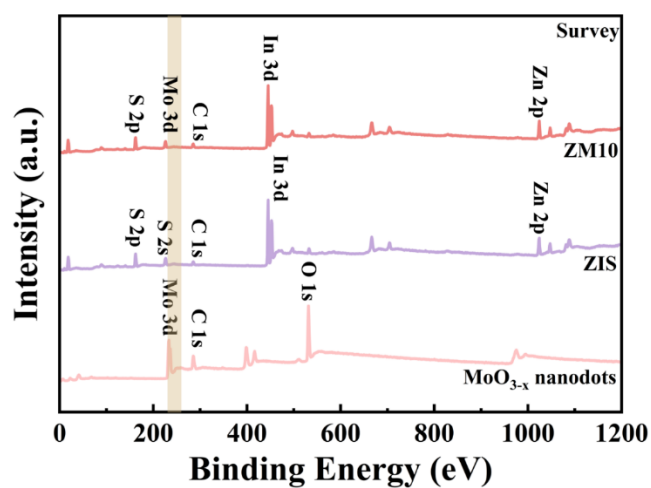

Fig. S4 XPS full-survey spectra of  $\text{MoO}_{3-x}$  nanodots, ZIS, and ZM10.

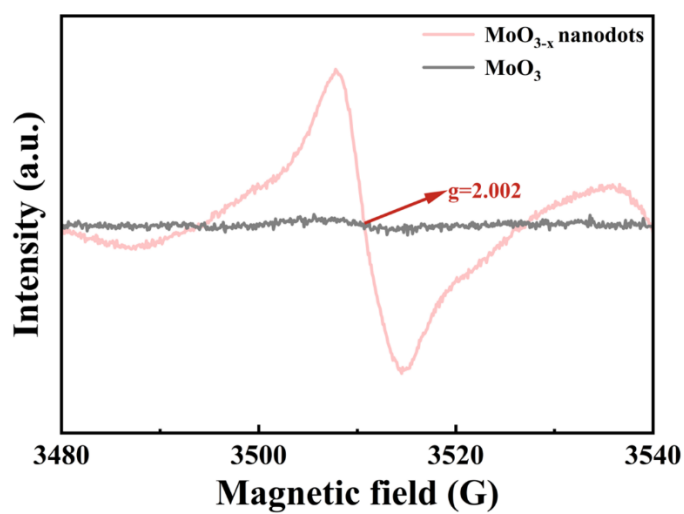

Fig. S5 EPR spectra of the  $\text{MoO}_3$  and  $\text{MoO}_{3-x}$  nanodots.

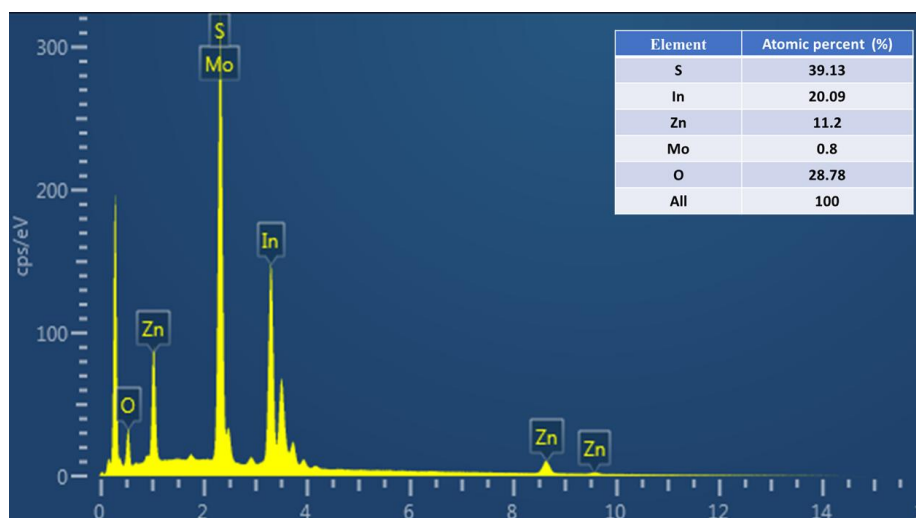

**Fig. S6** EDS analysis of ZM10.

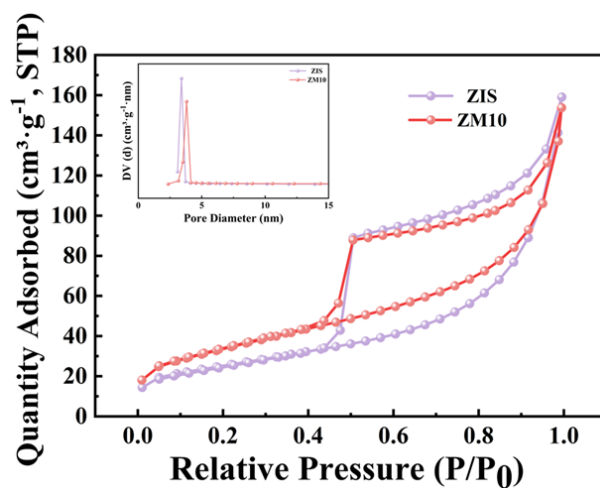

**Fig. S7** N<sub>2</sub> adsorption-desorption isotherms for ZIS and ZM10; the inset is the corresponding BJH pore-size distribution curves.

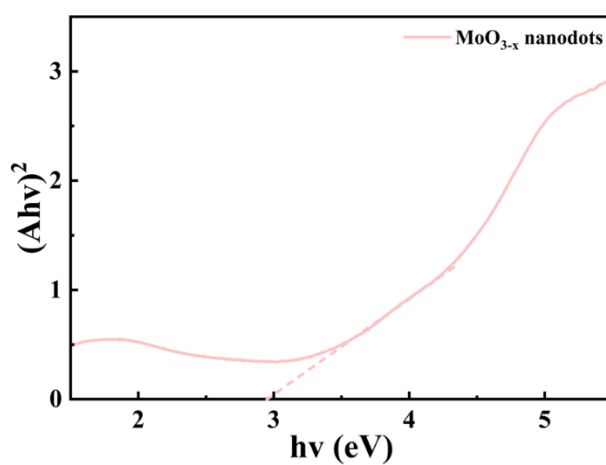

**Fig. S8** The band gap of MoO<sub>3-x</sub> nanodots.

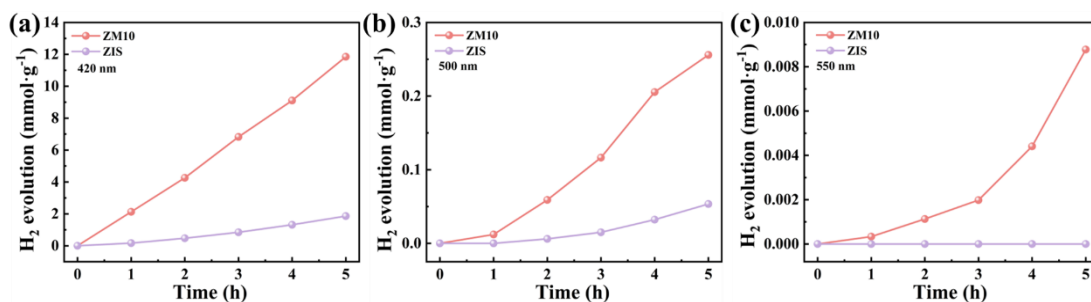

**Fig. S9** Hydrogen evolution performance of ZM10 and ZIS when irradiated using monochromatic lights at (a) 420 nm, (b) 500 nm, (c) 550 nm.

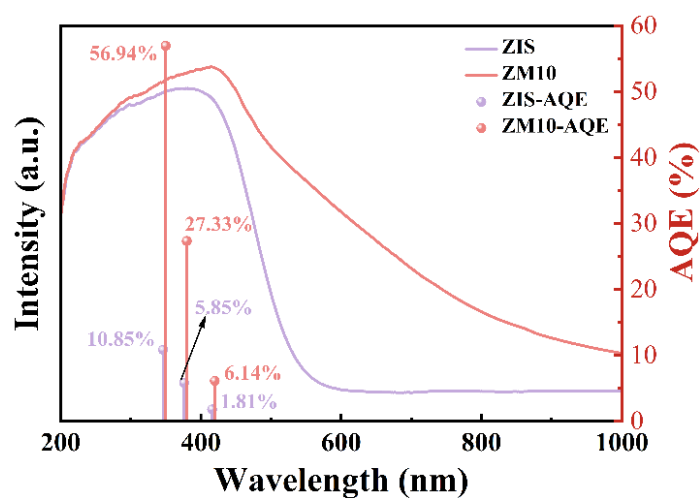

**Fig. S10** The wavelength-dependent AQEs of ZIS and ZM10.

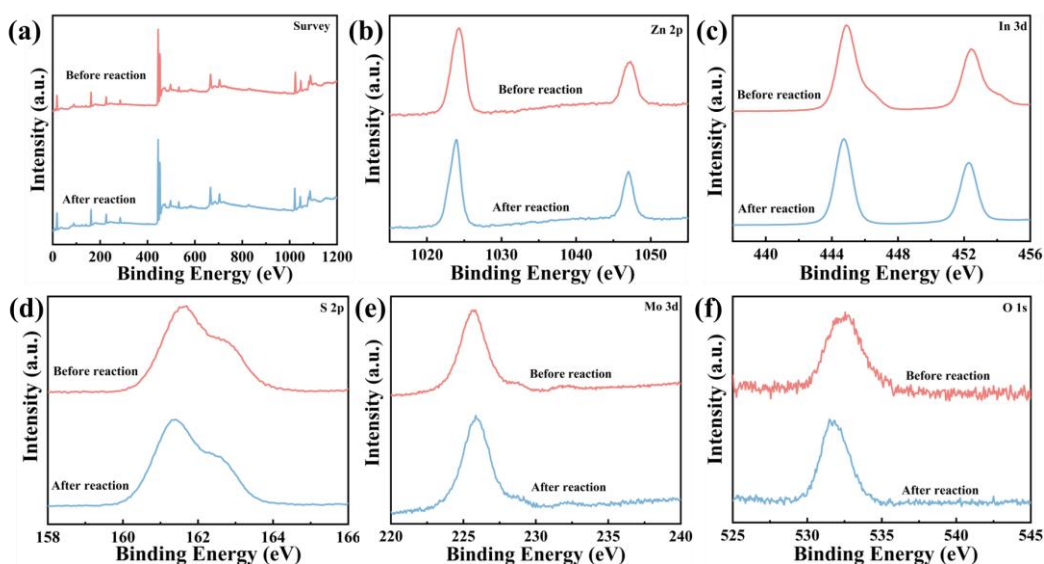

**Fig. S11** XPS spectra of ZM10 before and after reaction. (a) Full-survey XPS spectra, (b) Zn 2p spectrum, (c) In 3d spectrum, (d) S 2s spectrum, (e) Mo 3d spectrum, (f) O 1s spectrum.

Table. S1. ICP test calculation results.

| Quality of ZM10 (g) | Content of Zn (%) | Content of Mo (%) | Moles of Zn (mol)     | Moles of Mo (mol)     | Molar ratio |
|---------------------|-------------------|-------------------|-----------------------|-----------------------|-------------|
| 0.0437              | 13.82             | 1.06              | $9.26 \times 10^{-5}$ | $4.83 \times 10^{-6}$ | 19:1        |

**Table. S2.** Comparison of hydrogen production efficiency of ZIS or MoO<sub>3-x</sub> based photocatalysts.

| Photocatalyst                                                     | Mass (mg) | Light Source | Sacrificial reagent                                   | Hydrogen evolution rate (mmol·g <sup>-1</sup> ·h <sup>-1</sup> ) | Ref       |
|-------------------------------------------------------------------|-----------|--------------|-------------------------------------------------------|------------------------------------------------------------------|-----------|
| MoO <sub>3</sub> @Mo-ZnIn <sub>2</sub> S <sub>4</sub>             | 10        | 300W Xe lamp | TEOA                                                  | 5.5                                                              | 2         |
| Mo-doped ZnIn <sub>2</sub> S <sub>4</sub>                         | 20        | 300W Xe lamp | TEOA                                                  | 4.6                                                              | 3         |
| H <sub>x</sub> MoO <sub>3</sub> @ZnIn <sub>2</sub> S <sub>4</sub> | 20        | 300W Xe lamp | TEOA                                                  | 5.9                                                              | 4         |
| MoS <sub>2</sub> / ZnIn <sub>2</sub> S <sub>4</sub>               | 80        | 300W Xe lamp | Na <sub>2</sub> S and Na <sub>2</sub> SO <sub>3</sub> | 3.9                                                              | 5         |
| MoO <sub>2</sub> /ZnIn <sub>2</sub> S <sub>4</sub>                | 10        | 300W Xe lamp | Na <sub>2</sub> S and Na <sub>2</sub> SO <sub>3</sub> | 3.7                                                              | 6         |
| CdS/MoO <sub>3-x</sub>                                            | 25        | 350W Xe lamp | Lactic acid                                           | 7.44                                                             | 7         |
| BP-MoO <sub>3-x</sub>                                             | 10        | 300W Xe lamp | /                                                     | 0.4                                                              | 8         |
| α-MoO <sub>3-x</sub> /g-C <sub>3</sub> N <sub>4</sub>             | 50        | 300W Xe lamp | TEOA                                                  | 6.4                                                              | 9         |
| MoO <sub>3-x</sub> /Mn <sub>0.3</sub> Cd <sub>0.7</sub> S         | 50        | 300W Xe lamp | Lactic acid                                           | 2.3                                                              | 10        |
| ZnIn <sub>2</sub> S <sub>4</sub> /MoO <sub>3-x</sub>              | 30        | 300W Xe lamp | TEOA                                                  | 11.08                                                            | This work |

## References

- 1 Z. Yu, X. Luan, H. Xiao, Y. Yang, D. Luo, J. Zi and Z. Lian, *Appl. Catal., B.*, 2024, **347**, 123702.
- 2 H. Su, H. Lou, Z. Zhao, L. Zhou, Y. Pang, H. Xie, C. Rao, D. Yang and X. Qiu, *Chem. Eng. J.*, 2022, **430**, 132770.
- 3 F. Xing, Q. Liu and C. Huang, *Solar Rrl*, 2020, **4**, 1900483.
- 4 F. Xing, C. Cheng, J. Zhang, Q. Liu, C. Chen and C. Huang, *Appl. Catal., B.*, 2021, **285**, 119818.
- 5 Z. Zhang, L. Huang, J. Zhang, F. Wang, Y. Xie, X. Shang, Y. Gu, H. Zhao and X. Wang, *Appl. Catal., B.*, 2018, **233**, 112-119.
- 6 C. Ouyang, W. Huang, H. Tang, W. Liu, X. Gu, Z. Hong and M. Zhi, *ACS Appl. Energy Mater.*, 2022, **5**, 12739-12751.
- 7 J. Peng, J. Shen, X. Yu, H. Tang, Zulfiqar and Q. Liu, *Chinese. J. Catal.*, 2021, **42**, 87-96.
- 8 M. Hu, J. Zhu, W. Guo, Q. Xu, Y. Min and J. Fan, *ACS Sustainable Chem. Eng.*, 2022, **10**, 1008-1019.
- 9 Y. Ren, D. Feng, Z. Yan, Z. Sun, Z. Zhang, D. Xu, C. Qiao, Z. Chen, Y. Jia, S. Chan Jun, S. Liu and Y. Yamauchi, *Chem. Eng. J.*, 2023, **453**, 139875.
- 10 X. Yao, R. Zhang, M. Zhu, D. Zhang, X. Pu, J. Liu, H. Li and P. Cai, *Appl. Surf. Sci.*, 2024, **645**, 158890.
